# Supplementary material
Source: MDPI journal article supplement (https://www.mdpi.com/2571-9637/5/1/15)
Supplement: s1 [file s1]

Archive with 1 entries (1 files):
- surfaces-1520968-supplementary.pdf
